## Addendum: Librarians against scientists: Oncotarget's lesson

**Mikhail V. Blagosklonny**

*Published:* March 13, 2018

**Copyright:** Blagosklonny et al. This is an open-access article distributed under the terms of the Creative Commons Attribution License 3.0 (CC BY 3.0), which permits unrestricted use, distribution, and reproduction in any medium, provided the original author and source are credited.

**This article has an addendum:** The below information has been added to this article.  
<https://crln.acrl.org/index.php/crlnews/article/view/16837/18434>

Original article: Oncotarget. 2018; 9:5515-5516. <https://doi.org/10.18632/oncotarget.24272>
